# Supplementary material for: Cross-Cultural Adaptation and Validation of SNOT-20 in Portuguese
Source: Int J Otolaryngol. 2011 May 3;2011:306529. doi: 10.1155/2011/306529 (PMC3142655; doi:10.1155/2011/306529)
Supplement: Supplementary file 1 — Cross-cultural adapted and validated version of SNOT-20 in portuguese [file 306529.f1.pdf]

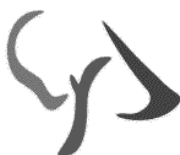

GRUPO DE RINOLOGIA DO HOSPITAL DAS CLÍNICAS DA USP

NOME: \_\_\_\_\_ SEXO: \_\_\_\_\_

RGHC: \_\_\_\_\_ IDADE: \_\_\_\_ TELEFONE: (\_\_\_\_) \_\_\_\_\_ - \_\_\_\_\_

### **AVALIAÇÃO DE RESULTADOS NASOSSINUSAIS. (SNOT-20)**

Você encontrará abaixo uma lista de sintomas e consequências sociais e emocionais da sua rinossinusite. Gostaríamos de saber mais sobre estes problemas e pedimos que respondesse às seguintes perguntas da melhor maneira possível. Não há respostas certas ou erradas e somente você pode nos dar essas informações. Por gentileza, dê uma nota para seus problemas conforme se apresentaram nas duas últimas semanas. Obrigado por sua participação. Caso tenha alguma dúvida, peça a nossa ajuda imediatamente.

|                                                                                                                                                                                                                                                                         | Nenhum problema | Problema muito pequeno | Problema pequeno | Problema moderado | Problema sério | Pior problema possível | 5 itens mais importantes |
|-------------------------------------------------------------------------------------------------------------------------------------------------------------------------------------------------------------------------------------------------------------------------|-----------------|------------------------|------------------|-------------------|----------------|------------------------|--------------------------|
| 1. Considerando a gravidade do problema, quando aparece e a frequência com que acontece; dê uma nota para cada item abaixo de acordo com o grau de intensidade do problema. Faça um círculo ao redor do número que corresponde ao que você sente. Use a escala ao lado: |                 |                        |                  |                   |                |                        |                          |
| 1. Necessidade de assoar o nariz                                                                                                                                                                                                                                        | 0               | 1                      | 2                | 3                 | 4              | 5                      | <input type="checkbox"/> |
| 2. Espirros                                                                                                                                                                                                                                                             | 0               | 1                      | 2                | 3                 | 4              | 5                      | <input type="checkbox"/> |
| 3. Nariz escorrendo                                                                                                                                                                                                                                                     | 0               | 1                      | 2                | 3                 | 4              | 5                      | <input type="checkbox"/> |
| 4. Tosse                                                                                                                                                                                                                                                                | 0               | 1                      | 2                | 3                 | 4              | 5                      | <input type="checkbox"/> |
| 5. Secreção nasal escorrendo para a garganta                                                                                                                                                                                                                            | 0               | 1                      | 2                | 3                 | 4              | 5                      | <input type="checkbox"/> |
| 6. Secreção nasal grossa                                                                                                                                                                                                                                                | 0               | 1                      | 2                | 3                 | 4              | 5                      | <input type="checkbox"/> |
| 7. Ouvido tampado                                                                                                                                                                                                                                                       | 0               | 1                      | 2                | 3                 | 4              | 5                      | <input type="checkbox"/> |
| 8. Tontura                                                                                                                                                                                                                                                              | 0               | 1                      | 2                | 3                 | 4              | 5                      | <input type="checkbox"/> |
| 9. Dor de Ouvido                                                                                                                                                                                                                                                        | 0               | 1                      | 2                | 3                 | 4              | 5                      | <input type="checkbox"/> |
| 10. Dor/ pressão na face                                                                                                                                                                                                                                                | 0               | 1                      | 2                | 3                 | 4              | 5                      | <input type="checkbox"/> |
| 11. Dificuldade de pegar no sono                                                                                                                                                                                                                                        | 0               | 1                      | 2                | 3                 | 4              | 5                      | <input type="checkbox"/> |
| 12. Acordar durante a noite                                                                                                                                                                                                                                             | 0               | 1                      | 2                | 3                 | 4              | 5                      | <input type="checkbox"/> |
| 13. Falta de uma boa noite de sono                                                                                                                                                                                                                                      | 0               | 1                      | 2                | 3                 | 4              | 5                      | <input type="checkbox"/> |
| 14. Acordar cansado                                                                                                                                                                                                                                                     | 0               | 1                      | 2                | 3                 | 4              | 5                      | <input type="checkbox"/> |
| 15. Fadiga                                                                                                                                                                                                                                                              | 0               | 1                      | 2                | 3                 | 4              | 5                      | <input type="checkbox"/> |
| 16. Produtividade diminuída                                                                                                                                                                                                                                             | 0               | 1                      | 2                | 3                 | 4              | 5                      | <input type="checkbox"/> |
| 17. Concentração reduzida                                                                                                                                                                                                                                               | 0               | 1                      | 2                | 3                 | 4              | 5                      | <input type="checkbox"/> |
| 18. Frustrado / Inquieto/ Irritado                                                                                                                                                                                                                                      | 0               | 1                      | 2                | 3                 | 4              | 5                      | <input type="checkbox"/> |
| 19. Triste                                                                                                                                                                                                                                                              | 0               | 1                      | 2                | 3                 | 4              | 5                      | <input type="checkbox"/> |
| 20. Envergonhado com a doença                                                                                                                                                                                                                                           | 0               | 1                      | 2                | 3                 | 4              | 5                      | <input type="checkbox"/> |

2. Favor marcar os itens mais importantes que estão prejudicando sua saúde (máximo de 5 itens) \_\_\_\_\_
